# Supplementary material
Source: publisher figshare collection journal article supplement (https://karger.figshare.com/articles/dataset/_/5104726)
Supplement: Supplementary file 1 [file 1]

### Supplemental Material for:

Linden/Lind/Quosh: Der Therapieerleben-Fragebogen (TeF) für Patienten und Angehörige  
Verhaltenstherapie 2008;18:35–42.

**Tab. 5.** Endgültiger Itemsatz (40 Items) des TeF für Patienten und Angehörige, geordnet nach Faktoren bzw. Skalen

#### Ängste und Befürchtungen vor negativen Therapiefolgen: 7 Items

- Ich habe Angst, durch die Therapie alleine dazustehen.
- Ich empfinde die Therapie als Vorwurf mir gegenüber.
- Ich habe Angst, dass ich durch die Therapie als Schuldige/r angesehen werde.
- Ich habe das Gefühl, dass man als Patient durch die Therapie noch mehr unter den bestehenden Problemen leidet.
- Ich habe Angst, durch die Therapie ausgegrenzt zu werden.
- Ich sehe meine Rolle in der Therapie als Schuldige/r.
- Ich habe Angst, dass man durch die Therapie ein anderer Mensch wird.

#### Informiertheit über die Therapie: 6 Items

- Ich fühle mich in Entscheidungen über anstehende Behandlungsschritte einbezogen.
- Ich weiß, was in der Therapie erreicht werden soll.
- Ich weiß, was in der Therapie passiert.
- Ich verstehe, was in der Therapie passiert.
- Ich führe mit anderen Gespräche über das, was in der Therapie läuft.
- Ich fühle mich nicht ausreichend informiert.

#### Positive Auswirkungen der Therapie auf das soziale Netz und den Alltag: 4 Items

- Ich habe das Gefühl, dass die Beziehung zu meiner Bezugsperson (z.B. Partner/in) durch die Therapie intensiver wird.
- Ich habe das Gefühl, dass meine Bezugsperson (z.B. Partner/in) und ich durch die Therapie besser mit Problemen umgehen.
- Ich habe das Gefühl, dass mein Bezugsperson (z.B. Partner/in) und ich durch die Therapie offener miteinander reden.
- Ich habe das Gefühl, dass die Therapie hilft, alltägliche Aufgaben besser zu erledigen.

#### Positive Auswirkungen der Therapie auf die eigenen Kompetenzen: 7 Items

- In der Therapie lernt man, besser mit Gefühlen umzugehen.
- In der Therapie lernt man, anders mit Problemen umzugehen.
- Die Therapie zielt darauf ab, andere Sichtweisen kennenzulernen.
- Ich denke, dass eine Therapie hilfreich sein kann.
- Ich hoffe, dass man durch die Therapie in die Lage versetzt wird, Probleme besser lösen zu können.
- Ich erhalte durch die Therapie Anregungen, die mir im Umgang mit Problemen nützlich sind.
- Die Therapie ist mir bei der Bewältigung von eigenen Problemen eine spürbare Hilfe.

#### Persönliches Engagement für die Therapie: 8 Items

- Ich tue das mir Mögliche, um die Therapie voranzubringen.
- Ich engagiere mich für die Therapie.
- Ich trage meinen Teil dazu bei, dass die Therapie ein Erfolg wird.
- Für die Therapie bringe ich gerne zusätzliche Zeit auf.
- Ich bin mit der Therapie zufrieden.
- Ich unterstütze die Therapie.
- Ich lehne die Therapie ab.
- Die mit der Therapie verbundenen Anstrengungen nehme ich gerne in Kauf.

#### Misstrauen und Gefühle des Ausgeliefertseins gegenüber der Therapie: 8 Items

- Ich fühle mich durch die Therapie persönlich angegriffen.
- Ich fühle mich durch die Therapie ausgeliefert.
- Ich befürchte, dass im Rahmen der Therapie sehr intime Dinge besprochen werden.
- Die Therapie macht mir Angst.
- Ich fühle mich durch die Therapie hintergangen.
- Ich fühle mich durch die Therapie im Stich gelassen.
- Ich empfinde die Therapie als Eingeständnis meines Versagens.
- Ich empfinde die Therapie als Vertrauensbruch.
