# Supplementary material
Source: publisher figshare collection journal article supplement (https://karger.figshare.com/articles/dataset/_/5104726)
Supplement: Supplementary file 2 [file 1]

### Supplemental Material for:

Linden/Lind/Quosh: Der Therapieerleben-Fragebogen (TeF) für Patienten und Angehörige  
Verhaltenstherapie 2008;18:35–42.

**Tab. 3. a** 5-Faktoren-Lösung (orthogonal rotiert) der Patientenstichprobe

|                                                                                                                | Komponente |           |           |           |           |
|----------------------------------------------------------------------------------------------------------------|------------|-----------|-----------|-----------|-----------|
|                                                                                                                | 1          | 2         | 3         | 4         | 5         |
| Ich habe Angst, durch die Therapie alleine dazustehen.                                                         | 0,761      | 3,573E-02 | 4,135E-02 | –0,331    | 1,995E-02 |
| Ich fühle mich der Therapie gegenüber machtlos.                                                                | 0,728      | –0,088    | –0,118    | –0,046    | 2,184E-02 |
| Ich fühle mich durch die Therapie ausgeliefert.                                                                | 0,674      | 8,521E-02 | –0,047    | –0,051    | –0,480    |
| Ich empfinde die Therapie als Vorwurf mir gegenüber.                                                           | 0,662      | –0,099    | –0,021    | 0,132     | 0,209     |
| Ich habe Angst, dass ich durch die Therapie als Schuldige/r gesehen werde.                                     | 0,645      | 4,240E-02 | –0,031    | –0,185    | 0,115     |
| Ich habe das Gefühl, dass man als Patient durch die Therapie noch mehr unter den bestehenden Problemen leidet. | 0,602      | –0,143    | –0,257    | 0,127     | –0,037    |
| Ich fühle mich dem Therapeuten gegenüber in gewissem Sinne als Konkurrent.                                     | 0,593      | –0,022    | –0,314    | 6,550E-02 | –0,125    |
| Ich stehe der Therapie misstrauisch gegenüber.                                                                 | 0,591      | –0,052    | –0,258    | –0,083    | –0,289    |
| Ich habe Angst, durch die Therapie ausgegrenzt zu werden.                                                      | 0,570      | –0,135    | –0,148    | 0,189     | –0,032    |
| Ich habe den Eindruck, dass man als Patient durch die Therapie noch mehr Sorgen bekommt.                       | 0,569      | –0,125    | –0,413    | –0,035    | –0,008    |
| Die Therapie macht mir Angst.                                                                                  | 0,539      | 3,287E-02 | 4,967E-02 | –0,085    | –0,259    |
| Ich sehe meine Rolle in der Therapie als Schuldiger.                                                           | 0,528      | –0,049    | –0,007    | 4,351E-02 | 1,239E-02 |
| Ich habe Angst, dass man durch die Therapie ein anderer Mensch wird.                                           | 0,513      | –0,171    | –0,210    | –0,014    | 0,378     |
| Ich fühle mich in Entscheidungen über anstehende Behandlungsschritte einbezogen.                               | 9,029E-02  | 0,827     | 6,559E-02 | –0,033    | 4,582E-02 |
| Ich weiß, was in der Therapie erreicht werden soll.                                                            | 8,600E-03  | 0,777     | 0,223     | 2,880E-02 | –0,069    |
| Ich weiß, was in der Therapie passiert.                                                                        | –0,093     | 0,741     | 1,410E-02 | –0,067    | –0,026    |
| Ich verstehe, was in der Therapie passiert.                                                                    | –0,192     | 0,720     | –0,008    | 0,116     | 5,048E-02 |
| Ich glaube nicht, dass Therapie irgendetwas verändern kann.                                                    | –0,011     | –0,682    | –0,186    | –0,248    | 0,113     |
| Ich fühle mich ausreichend über den Behandlungsablauf informiert.                                              | –0,067     | 0,633     | 0,377     | 1,121E-02 | 0,156     |
| Ich habe das Gefühl, dass in der Therapie Fortschritte erzielt werden.                                         | –0,236     | 0,580     | 0,123     | 0,379     | 0,470     |
| Ich habe das Gefühl, dass man als Patient durch die Therapie ein schlechteres Befinden bekommt.                | 0,280      | –0,572    | 0,183     | –0,264    | –0,040    |
| Ich führe mit anderen Gespräche über das, was in der Therapie läuft.                                           | 0,224      | 0,567     | 0,120     | 4,562E-02 | –0,062    |
| Ich empfinde die Therapie als eine Last.                                                                       | 0,296      | –0,547    | 0,192     | –0,308    | –0,200    |
| Ich fühle mich nicht ausreichend informiert.                                                                   | –0,030     | –0,543    | –0,361    | –0,060    | 8,084E-02 |
| In der Therapie lernt man, besser mit Gefühlen umzugehen.                                                      | 7,328E-02  | –0,048    | 0,767     | 0,212     | 0,286     |
| In der Therapie lernt man, anders mit Problemen umzugehen.                                                     | 5,311E-02  | 0,179     | 0,759     | –0,153    | 1,550E-02 |
| Die Therapie zielt darauf ab, andere Sichtweisen kennenzulernen.                                               | 4,513E-03  | 5,004E-02 | 0,730     | –0,086    | –0,085    |
| Ich denke, dass eine Therapie hilfreich sein kann.                                                             | –0,115     | 5,739E-02 | 0,688     | –0,157    | 4,575E-02 |
| Ich hoffe, dass man durch die Therapie in die Lage versetzt wird, Probleme besser lösen zu können.             | 3,310E-02  | 1,086E-02 | 0,585     | –0,065    | 0,404     |
| Ich hoffe, dass es mir durch die Therapie besser geht.                                                         | 3,753E-03  | –0,028    | 0,584     | 0,123     | 0,300     |
| Ich erhalte durch die Therapie Anregungen, die mir im Umgang mit Problemen nützlich sind.                      | –0,068     | 0,395     | 0,580     | 0,216     | 1,473E-02 |
| Die Therapie ist mir bei der Bewältigung von eigenen Problemen eine spürbare Hilfe.                            | 9,801E-02  | 0,242     | 0,549     | 0,341     | 0,331     |
| Ich habe das Gefühl, dass die Beziehung zu meiner Bezugsperson durch die Therapie intensiver wird.             | 0,162      | 8,419E-02 | 8,582E-02 | 0,788     | 0,138     |
| Ich habe das Gefühl, dass meine Bezugsperson und ich durch die Therapie besser mit Problemen umgehen.          | –0,184     | –0,256    | 0,286     | 0,729     | –0,006    |
| Ich habe das Gefühl, dass meine Bezugsperson und ich durch die Therapie offener miteinander reden.             | 0,204      | 9,233E-02 | –0,120    | 0,706     | –0,155    |
| Ich habe das Gefühl, dass meine Bezugsperson und ich durch die Therapie mehr gemeinsam unternehmen.            | 0,123      | 0,163     | 3,987E-02 | 0,592     | 0,237     |
| Ich habe das Gefühl, dass meine Bezugsperson und ich durch die Therapie weniger miteinander streiten.          | –0,135     | 0,139     | –0,015    | 0,581     | 8,382E-02 |
| Ich habe das Gefühl, dass man als Patient durch die Therapie eine bessere Stimmung bekommt.                    | –0,294     | 0,277     | 2,220E-02 | 0,579     | 0,101     |
| Ich habe das Gefühl, dass die Therapie hilft, alltägliche Aufgaben besser zu erledigen.                        | 7,626E-02  | 0,382     | 0,492     | 0,549     | –0,009    |
| Ich fühle mich durch die Therapie entlastet.                                                                   | 1,079E-02  | 7,711E-02 | 0,395     | 0,547     | 3,242E-02 |
| Ich habe das Gefühl, dass meine Bezugsperson und ich durch die Therapie über intimere Dinge reden.             | 0,381      | 0,171     | –0,033    | 0,511     | –0,241    |

**Tab. 3. a** 5-Faktoren-Lösung (orthogonal rotiert) der Patientenstichprobe (Fortsetzung)

|                                                                         | Komponente |           |           |           |        |
|-------------------------------------------------------------------------|------------|-----------|-----------|-----------|--------|
|                                                                         | 1          | 2         | 3         | 4         | 5      |
| Ich tue das mir mögliche, um die Therapie voranzubringen.               | -0,102     | 0,462     | -0,077    | 0,105     | 0,738  |
| Ich engagiere mich für die Therapie.                                    | -0,038     | 0,468     | 8,514E-02 | 9,559E-02 | 0,725  |
| Ich trage meinen Teil dazu bei, damit die Therapie ein Erfolg wird.     | -0,103     | -0,064    | 0,153     | -0,056    | 0,718  |
| Für die Therapie bringe ich gerne zusätzliche Zeit auf.                 | -0,084     | -0,204    | 0,270     | 8,702E-02 | 0,598  |
| Ich fühle mich durch die Therapie persönlich angegriffen.               | 0,480      | 0,141     | 0,120     | 9,290E-02 | -0,597 |
| Ich bin mit der Therapie zufrieden.                                     | -0,232     | 0,212     | 0,420     | 0,189     | 0,551  |
| Ich unterstütze die Therapie.                                           | -0,239     | 1,373E-02 | 0,272     | -0,082    | 0,527  |
| Ich lehne die Therapie ab.                                              | 0,465      | 1,469E-02 | -0,054    | -0,016    | -0,522 |
| Die mit der Therapie verbundenen Anstrengungen nehme ich gerne in Kauf. | -0,214     | 0,189     | 4,318E-02 | 0,126     | 0,508  |
| Ich erlebe die Therapie als erfolgreich.                                | -0,222     | 0,481     | 0,262     | 0,453     | 0,505  |

**Tab. 3. b** 5-Faktoren-Lösung (orthogonal rotiert) der Angehörigenstichprobe

|                                                                                                          | Komponente |            |            |            |            |
|----------------------------------------------------------------------------------------------------------|------------|------------|------------|------------|------------|
|                                                                                                          | 1          | 2          | 3          | 4          | 5          |
| Ich habe das Gefühl, dass in der Therapie Fortschritte erzielt werden.                                   | 0,795      | 0,211      | -0,329     | -0,110     | 0,122      |
| Ich habe das Gefühl, dass die Therapie hilft, alltägliche Aufgaben besser zu erledigen.                  | 0,764      | 0,434      | 6,656E-02  | -0,071     | -0,048     |
| Ich habe den Eindruck, dass man als Patient durch die Therapie ein besseres Befinden erhält.             | 0,732      | 8,809E-02  | -0,209     | -0,020     | -0,072     |
| In der Therapie lernt man, anders mit Problemen umzugehen.                                               | 0,706      | 1,146E-02  | -0,247     | -0,115     | 0,349      |
| Ich habe den Eindruck, dass man als Patient durch die Therapie keine Veränderungen erfährt.              | -0,691     | -0,036     | 0,148      | 9,893E-02  | -0,281     |
| Ich erlebe die Therapie als erfolgreich.                                                                 | 0,682      | 0,373      | -0,136     | -0,186     | -0,099     |
| In der Therapie lernt man neue Verhaltensweisen.                                                         | 0,667      | 0,317      | 2,608E-02  | -0,177     | 0,268      |
| Ich habe das Gefühl, dass man als Patient durch die Therapie eine bessere Stimmung bekommt.              | 0,644      | 4,466E-02  | -0,302     | -7,522E-02 | -2,052E-02 |
| In der Therapie lernt man, besser mit Gefühlen umzugehen.                                                | 0,623      | 0,132      | -2,933E-02 | -0,131     | 0,385      |
| Ich glaube nicht, dass die Therapie etwas an den bestehenden Problemen verändert wird.                   | -0,615     | -7,066E-02 | 0,275      | 7,181E-02  | 0,184      |
| Ich habe das Gefühl, dass man als Patient durch die Therapie weniger krankheitsbedingte Beschwerden hat. | 0,586      | 0,454      | 0,123      | -4,120E-02 | -8,293E-02 |
| Ich habe den Eindruck, dass man als Patient durch die Therapie zu mehr Aktivitäten angeregt wird.        | 0,579      | 0,425      | 4,140E-02  | -0,111     | 0,134      |
| Ich betrachte Therapie als Zeitverschwendung.                                                            | -0,562     | -2,374E-02 | 0,344      | 0,190      | -0,230     |
| Ich habe das Gefühl, dass meine Bezugsperson und ich durch die Therapie besser mit Problemen umgehen.    | 0,558      | -1,349E-02 | -0,205     | 7,194E-02  | 0,402      |
| Ich bin mit der Therapie zufrieden.                                                                      | 0,556      | 0,295      | -0,154     | -0,269     | 0,239      |
| Ich stehe der Therapie misstrauisch gegenüber.                                                           | -0,549     | -1,173E-02 | 0,356      | 0,432      | -0,246     |
| Ich habe das Gefühl, dass die Beziehung zu meiner Bezugsperson durch die Therapie intensiver wird.       | 0,514      | 0,252      | -4,201E-03 | 0,279      | 0,144      |
| Ich stehe Therapie allgemein skeptisch gegenüber.                                                        | -0,510     | -8,619E-02 | 0,373      | 0,113      | -6,366E-02 |
| Ich habe das Gefühl, dass meine Bezugsperson und ich durch die Therapie offener miteinander reden.       | 0,507      | 0,422      | 0,108      | 8,668E-02  | -6,584E-02 |
| Ich fühle mich in Entscheidungen über anstehende Behandlungsschritte einbezogen.                         | 1,955E-02  | 0,755      | -0,140     | -2,953E-02 | 0,159      |
| Ich erhalte durch die Therapie Anregungen, die mir im Umgang mit Problemen nützlich sind.                | 6,739E-02  | 0,740      | -0,103     | 7,584E-02  | 0,238      |
| Ich weiß, was in der Therapie erreicht werden soll.                                                      | 0,290      | 0,728      | -4,651E-02 | -5,036E-02 | 3,875E-02  |
| Die Therapie ist mir keine große Hilfe.                                                                  | -0,281     | -0,722     | 3,505E-03  | 0,216      | 0,203      |
| Ich fühle mich der Therapie gegenüber machtlos.                                                          | 1,978E-02  | -0,695     | 0,186      | 0,286      | 9,441E-02  |
| Ich weiß, was in der Therapie passiert.                                                                  | 6,930E-02  | 0,690      | -8,988E-02 | -5,283E-02 | 0,185      |
| Ich engagiere mich für die Therapie.                                                                     | 1,764E-02  | 0,686      | 0,138      | 4,963E-03  | 0,234      |
| Ich verstehe, was in der Therapie passiert.                                                              | 0,167      | 0,685      | -5,478E-02 | -0,187     | 0,268      |
| Ich fühle mich durch die Therapie unterstützt.                                                           | 0,277      | 0,673      | -0,165     | -0,141     | 6,148E-02  |
| Ich hoffe, dass es mir durch die Therapie besser geht.                                                   | 0,150      | 0,668      | 3,360E-02  | -3,308E-02 | -8,919E-02 |
| Ich führe mit anderen Gespräche über das, was in der Therapie läuft.                                     | -5,358E-02 | 0,667      | -0,162     | -3,183E-02 | 0,175      |
| Ich setze große Hoffnungen in die Person des Therapeuten.                                                | 0,384      | 0,652      | 8,457E-02  | -0,152     | -8,431E-02 |
| Es ist mir egal, was in der Therapie passiert.                                                           | -0,178     | -0,625     | -6,644E-02 | -0,225     | -0,189     |
| Ich fühle mich durch die Therapie nicht unterstützt.                                                     | -0,174     | -0,609     | -3,533E-02 | 0,157      | 0,292      |
| Die Therapie ist mir bei der Bewältigung von eigenen Problemen eine spürbare Hilfe.                      | -1,162E-02 | 0,608      | 7,809E-02  | 0,193      | 0,324      |
| Ich fühle mich nicht ausreichend informiert.                                                             | -0,212     | -0,551     | 0,123      | 0,252      | 4,868E-02  |
| Ich fühle mich durch die Therapie entlastet.                                                             | 0,436      | 0,525      | -5,254E-02 | -0,147     | -0,197     |
| Ich habe eine Vorstellung davon, was in der Therapie als nächstes passiert.                              | -3,297E-02 | 0,513      | 0,151      | 1,174E-02  | 0,268      |
| Ich rede mit anderen über die Therapie.                                                                  | 1,816E-02  | 0,510      | -6,171E-02 | 0,248      | 0,171      |

**Tab. 3. b** 5-Faktoren-Lösung (orthogonal rotiert) der Angehörigenstichprobe (Fortsetzung)

|                                                                                                                      | Komponente |            |            |            |            |
|----------------------------------------------------------------------------------------------------------------------|------------|------------|------------|------------|------------|
|                                                                                                                      | 1          | 2          | 3          | 4          | 5          |
| Ich habe das Gefühl, dass meine Bezugsperson und ich durch die Therapie mehr Auseinandersetzungen haben als vorher.  | 9,146E-02  | -2,056E-02 | 0,793      | 0,122      | 7,205E-02  |
| Der Therapeut weiß Dinge über mich, die ihn nichts angehen.                                                          | -7,070E-02 | -1,360E-02 | 0,782      | 0,256      | 7,077E-02  |
| Ich habe Angst, durch die Therapie alleine dazustehen.                                                               | -3,026E-02 | -5,194E-02 | 0,755      | 0,175      | -0,170     |
| Ich habe Angst, dass man durch die Therapie ein anderer Mensch wird.                                                 | -0,206     | 1,838E-02  | 0,702      | 0,197      | 6,064E-02  |
| Ich habe Angst, durch die Therapie ausgegrenzt zu werden.                                                            | -0,101     | -1,725E-02 | 0,674      | -4,833E-03 | -5,474E-02 |
| Ich befürchte, dass sich die Beziehungen zwischen mir und anderen Menschen aufgrund der Therapie verschlechtern.     | -0,108     | 5,912E-02  | 0,658      | 0,108      | -8,465E-02 |
| Ich empfinde die Therapie als Vorwurf mir gegenüber.                                                                 | -0,281     | -0,124     | 0,639      | 0,126      | -1,803E-02 |
| Ich habe das Gefühl, dass sich durch die Therapie die Beziehung zwischen meiner Bezugsperson und mir verschlechtert. | -4,444E-02 | 2,038E-04  | 0,627      | 0,285      | -4,299E-02 |
| Ich sehe meine Rolle in der Therapie als Schuldiger.                                                                 | -0,209     | -4,813E-02 | 0,624      | 3,666E-02  | 4,162E-02  |
| Ich habe das Gefühl, dass man als Patient durch die Therapie noch mehr unter den bestehenden Problemen leidet.       | 5,531E-02  | -3,940E-02 | 0,611      | 0,332      | -9,664E-02 |
| Ich befürchte, dass man sich durch die Therapie von anderen Menschen entfremdet.                                     | 5,212E-02  | -5,751E-02 | 0,603      | 0,145      | -0,406     |
| Die mit der Therapie verbundenen Anstrengungen nehme ich gerne in Kauf.                                              | 0,430      | 0,101      | -0,587     | -0,161     | 0,121      |
| Ich habe Angst, dass ich durch die Therapie als Schuldige/r gesehen werde.                                           | -0,117     | -7,347E-02 | 0,582      | 6,734E-03  | 7,763E-02  |
| Ich habe das Gefühl, dass mein Bezugsperson und ich durch die Therapie weniger miteinander unternehmen.              | 9,958E-02  | 1,973E-04  | 0,566      | 0,275      | 6,627E-02  |
| Ich fühle mich durch die Therapie persönlich angegriffen.                                                            | -0,230     | -0,170     | 0,170      | 0,835      | -0,157     |
| Ich fühle mich durch die Therapie ausgeliefert.                                                                      | 6,573E-02  | 1,375E-02  | 0,141      | 0,736      | -6,297E-02 |
| Ich befürchte, dass im Rahmen der Therapie sehr intime Dinge besprochen werden.                                      | -0,162     | -3,824E-02 | 0,369      | 0,729      | 2,724E-03  |
| Die Therapie macht mir Angst.                                                                                        | -0,116     | -5,977E-02 | 0,156      | 0,703      | -0,138     |
| Ich fühle mich durch die Therapie hintergangen.                                                                      | -0,150     | -0,184     | 0,212      | 0,676      | -0,166     |
| Ich fühle mich durch die Therapie im Stich gelassen.                                                                 | -0,208     | -0,137     | 0,200      | 0,673      | -0,231     |
| Ich empfinde die Therapie als Eingeständnis meines Versagens.                                                        | 3,644E-02  | -1,035E-02 | -1,676E-02 | 0,655      | 5,080E-02  |
| Ich empfinde die Therapie als eine Last.                                                                             | -4,289E-02 | -1,924E-02 | 9,788E-02  | 0,628      | -7,874E-02 |
| Ich empfinde die Therapie als Vertrauensbruch.                                                                       | -0,297     | -0,116     | 0,154      | 0,598      | -5,910E-02 |
| Ich finde es gut, bei Problemen eine Psychotherapie in Anspruch zu nehmen.                                           | 0,392      | 0,170      | 5,110E-02  | -0,545     | 0,305      |
| Ich hoffe, dass man durch die Therapie in die Lage versetzt wird, Probleme besser lösen zu können.                   | 0,405      | 0,122      | -2,553E-02 | -3,316E-02 | 0,682      |
| Ich trage meinen Teil dazu bei, damit die Therapie ein Erfolg wird.                                                  | 0,152      | 0,132      | 0,145      | -0,124     | 0,646      |
| Ich unterstütze die Therapie.                                                                                        | 0,304      | 0,139      | -0,379     | 0,174      | 0,631      |
| Ich fühle mich ausreichend über den Behandlungsablauf informiert.                                                    | 4,776E-03  | 0,383      | 3,839E-02  | -4,480E-02 | 0,613      |
| Ich finde die Therapie gut.                                                                                          | 0,396      | 0,281      | -5,111E-02 | -0,213     | 0,537      |
| Ich habe Angst, dass ich aufgrund der Therapie Kontakte zu anderen verringern oder abbrechen.                        | -0,115     | 4,429E-02  | 0,311      | 0,306      | -0,505     |
| Die Therapie zielt darauf ab, andere Sichtweisen kennen zu lernen.                                                   | 0,367      | 3,875E-02  | -0,240     | -6,337E-03 | 0,501      |
